# Supplementary material
Source: PubMed Central journal article supplement (PMC5571303)
Supplement: AAC.00774-17_zac009176465s1.pdf [file AAC.00774-17_zac009176465s1.pdf]

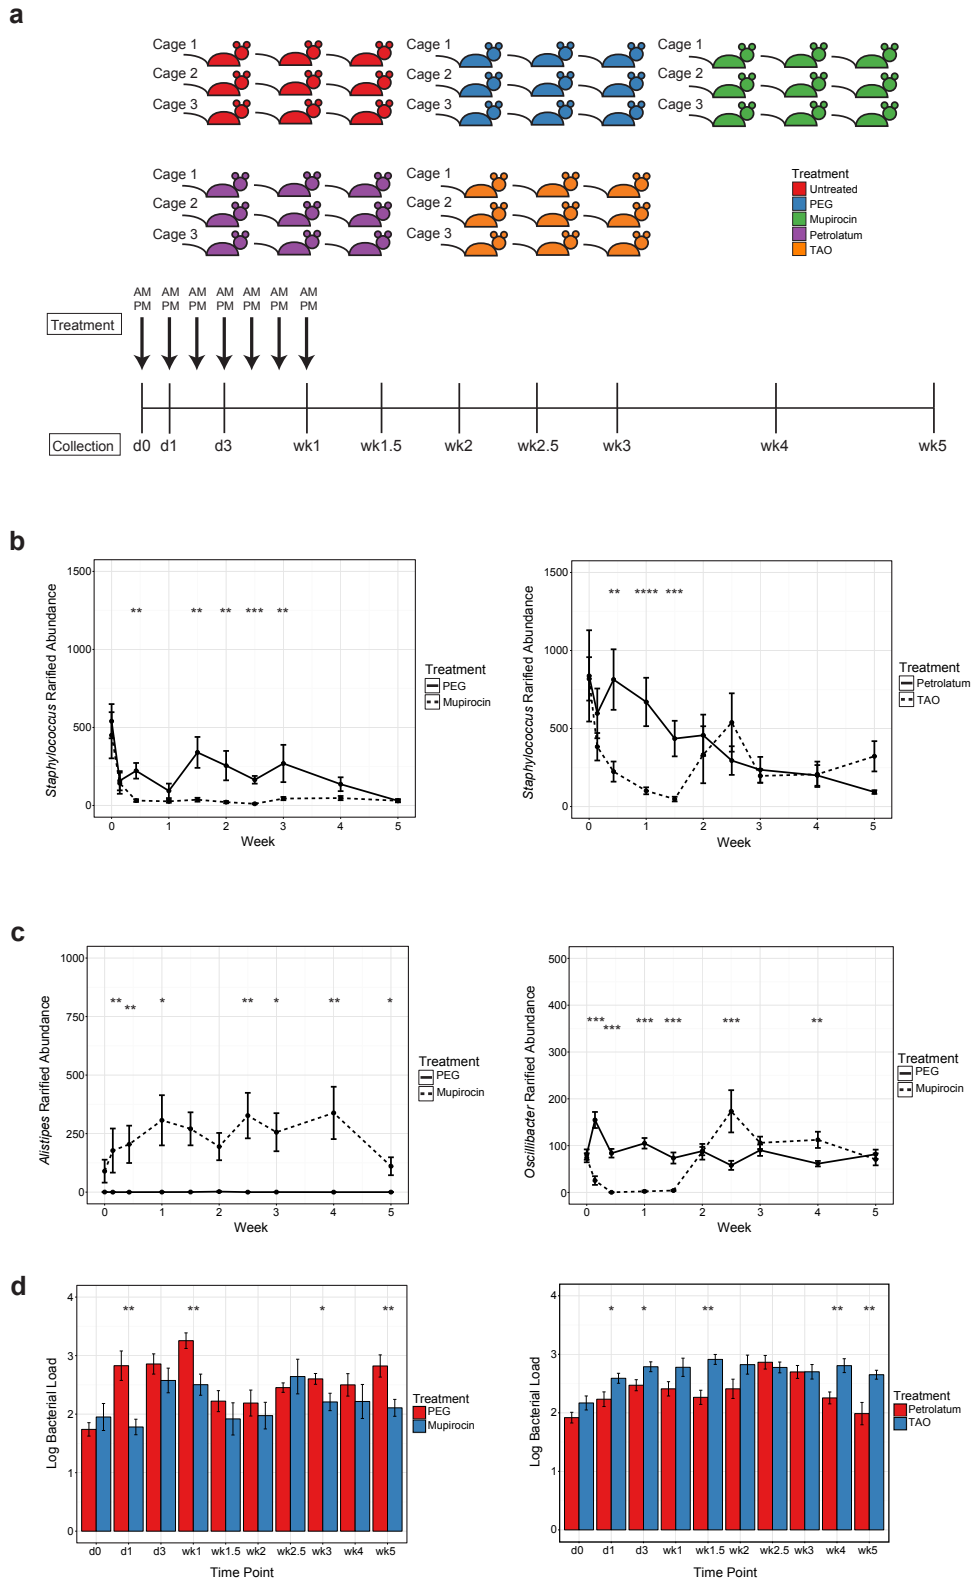

**Supplementary Figure 1 | Long-term alterations of select bacterial taxa in response to topical antibiotic treatment.**

(a) Schematic diagram of antibiotic treatments and sample collection regimen in mice administered polyethylene glycol (PEG), mupirocin, petrolatum, or triple antibiotic ointment (TAO). Treatment cohorts consisted of nine mice total, three cages of three mice each. Treatment occurred every 12 hours for one week, and mice were followed for 4 weeks post-treatment. (b,c) Longitudinal rarified abundances of (b) *Staphylococcus* and (c) *Alistipes* and *Oscillibacter*. (d) Variations in bacterial burden over time in response to treatment. Data are presented as mean  $\pm$  s.e.m. Statistical significance was determined at each time point by Wilcoxon rank sum test (Mann Whitney U test). \* $P < 0.05$ , \*\*  $P < 0.01$ , \*\*\*  $P < 0.001$ , \*\*\*\*  $P < 0.0001$ .

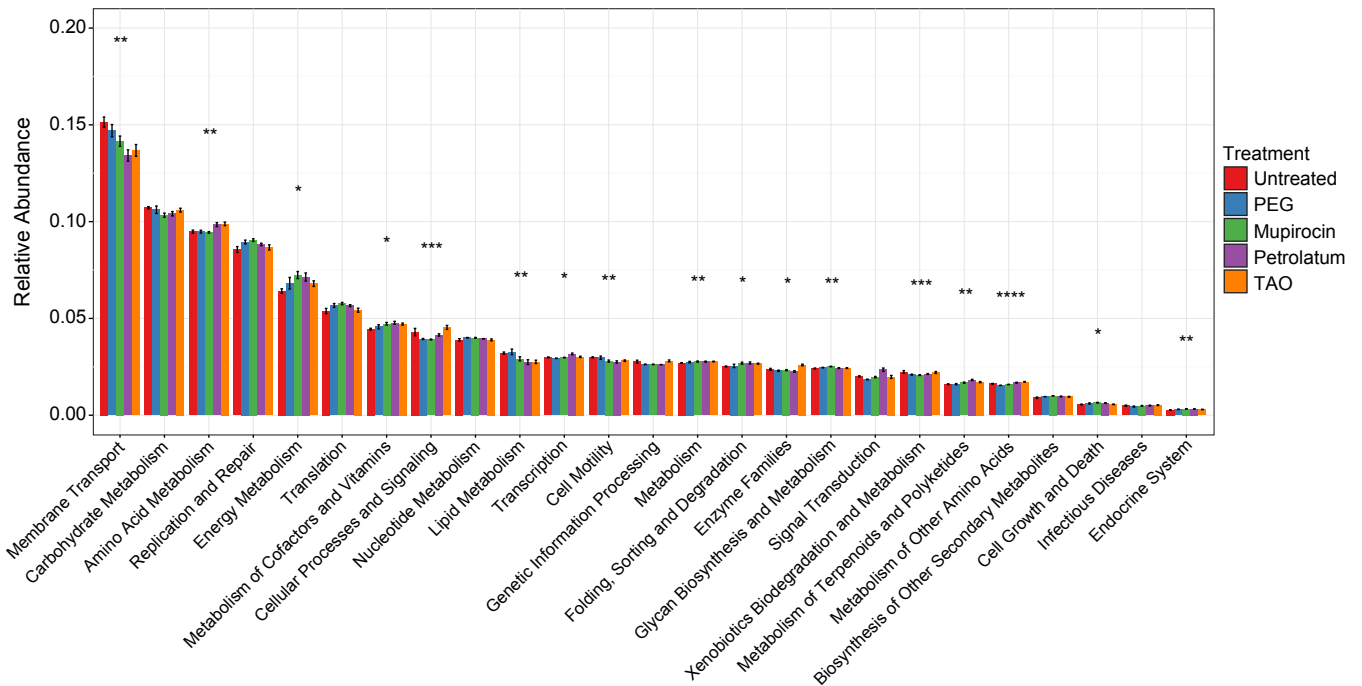

**Supplementary Figure 2 | Changes to functional potential of bacterial communities in response to topical antibiotic treatment.**

Relative abundances of major KEGG Pathways calculated by PICRUSt analysis of bacterial populations following one week of treatment with polyethylene glycol (PEG), mupirocin, petrolatum, or triple antibiotic ointment (TAO). Data are presented as mean  $\pm$  s.e.m. Statistical significance was determined for major pathway designations by comparing across all treatments with the Kruskal-Wallis rank sum test and FDR correction. \*P < 0.05, \*\* P < 0.01, \*\*\* P < 0.001, \*\*\*\* P < 0.0001.

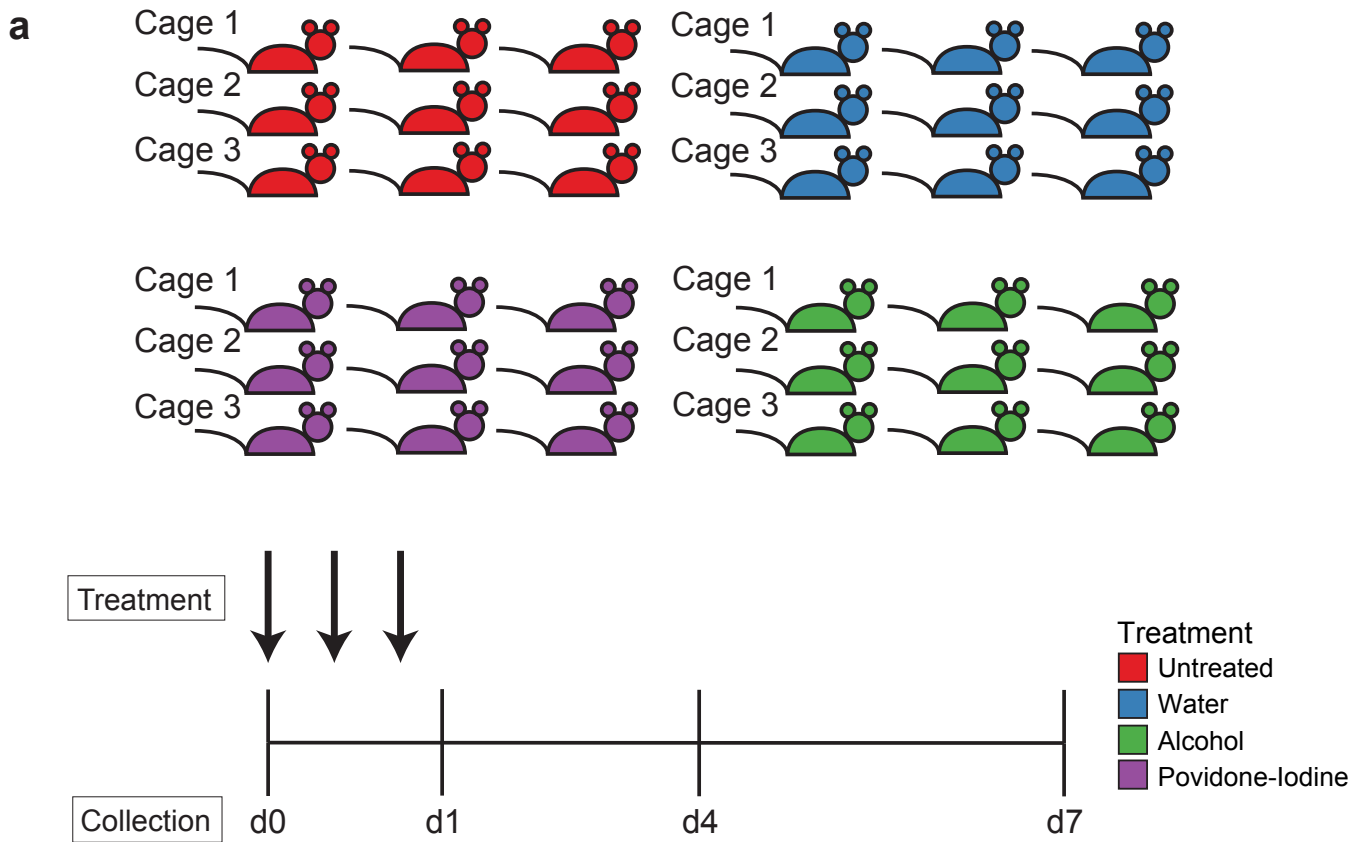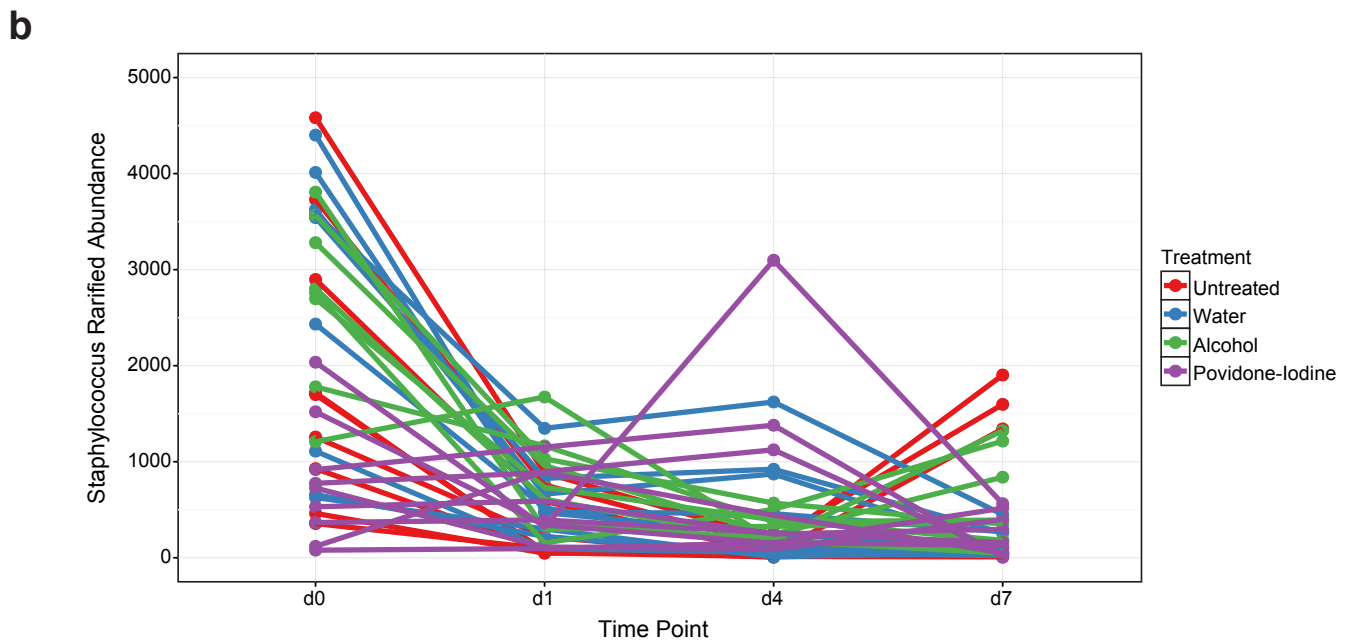

**Supplementary Figure 3 | Effects of antiseptics on skin bacterial inhabitants.**

(a) Model of antiseptic treatments and sample collection in mice treated with water, alcohol, or povidone-iodine. Treatment cohorts consisted of nine mice total, three cages of three mice each. Mice received three treatments total, one every 8 hours, and were followed for one-week post treatment. (b) Rarified *Staphylococcus* abundance in response to treatment over time. Data are presented as individual mice and colored by treatment.

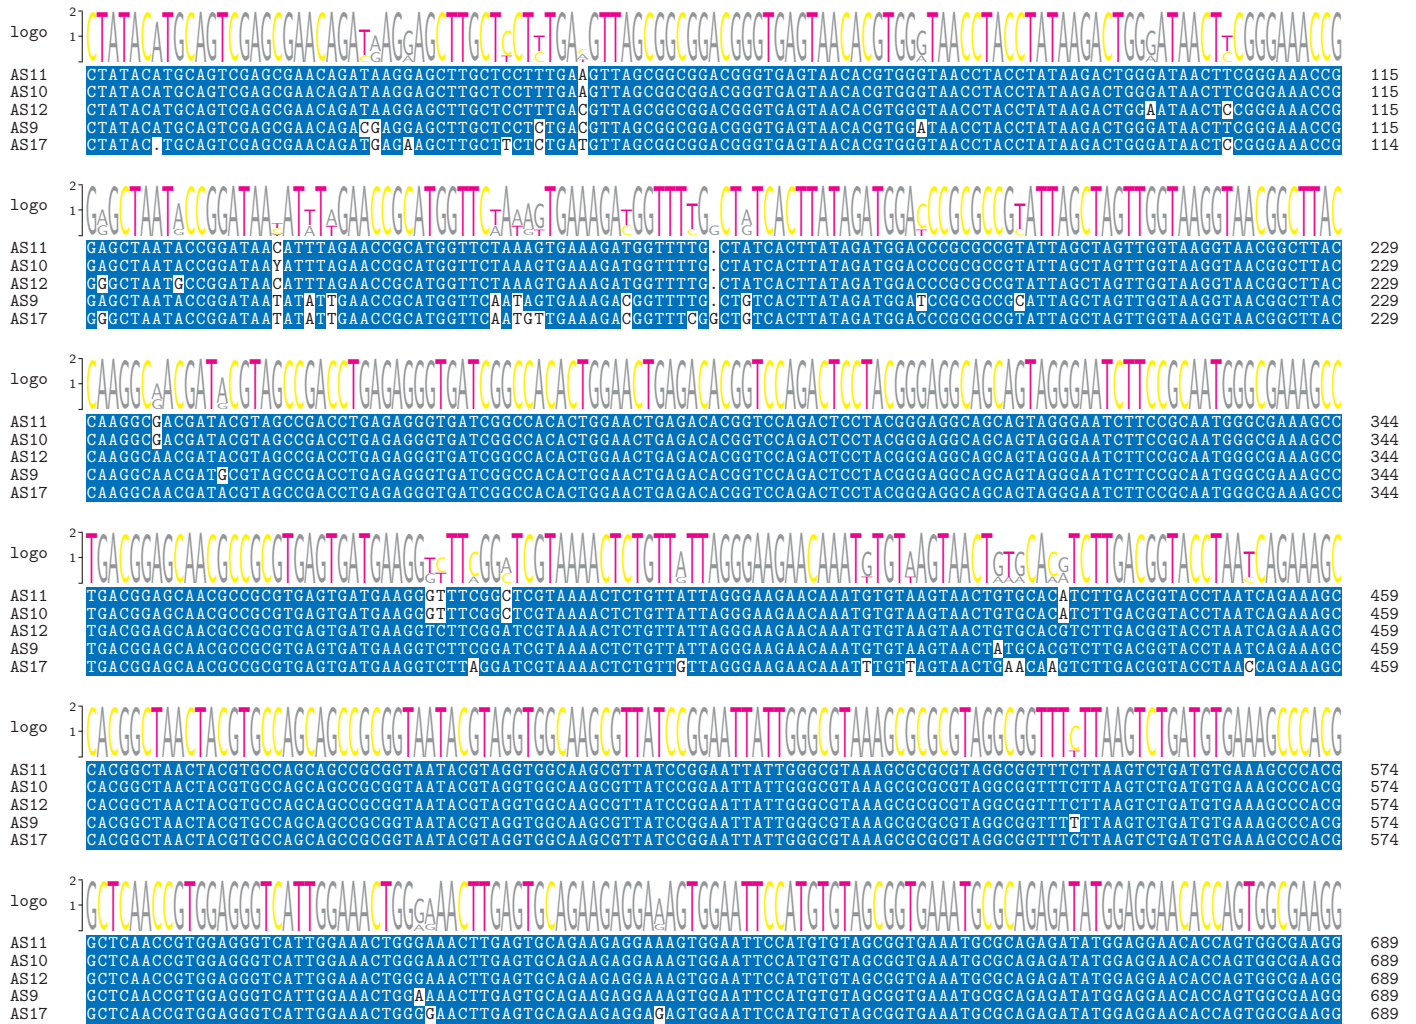

**Supplementary Figure 4 | Resident *Staphylococcus* isolate 16S rRNA gene sequences.** Comparison of Sanger sequenced murine resident *Staphylococcus* 16S rRNA genes. Consensus sequence logo is noted above isolate sequences. Nucleotides with greater than 50% conserved identity are depicted in blue. Non-conserved nucleotides are unhighlighted.

**Supplementary Table 1 | Taxonomic comparisons of treatment groups at d1 post-treatment**

| <b>Lineage</b>                                                                            | <b>FDR-corrected p-value</b> |
|-------------------------------------------------------------------------------------------|------------------------------|
| Actinobacteria; Actinobacteria; Actinomycetales; Microbacteriaceae                        | 0.9263883                    |
| Actinobacteria; Actinobacteria; Actinomycetales; Micrococcaceae; Kocuria                  | 0.6638857                    |
| Bacteroidetes; Bacteroidia; Bacteroidales; Porphyromonadaceae                             | 0.6638857                    |
| Bacteroidetes; Bacteroidia; Bacteroidales; Porphyromonadaceae; Parabacteroides            | 0.4254647                    |
| Bacteroidetes; Flavobacteria; Flavobacteriales; Flavobacteriaceae; Chryseobacterium       | 0.6638857                    |
| Bacteroidetes; Flavobacteria; Flavobacteriales; Flavobacteriaceae; Elizabethkingia        | 0.6638857                    |
| Bacteroidetes; Flavobacteria; Flavobacteriales; Flavobacteriaceae; Flavobacterium         | 0.6486878                    |
| Bacteroidetes; Sphingobacteria; Sphingobacteriales; Sphingobacteriaceae; Sphingobacterium | 0.1687431                    |
| Deferribacteres; Deferribacteres; Deferribacterales; Deferribacteraceae; Mucispirillum    | 0.395196                     |
| Firmicutes; Bacilli; Bacillales; Staphylococcaceae; Jeotgalicoccus                        | 0.6638857                    |
| Firmicutes; Bacilli; Bacillales; Staphylococcaceae; Staphylococcus                        | 0.3879636                    |
| Firmicutes; Bacilli; Lactobacillales; Enterococcaceae; Enterococcus                       | 0.3879636                    |
| Firmicutes; Bacilli; Lactobacillales; Lactobacillaceae; Lactobacillus                     | 0.6638857                    |
| Firmicutes; Bacilli; Lactobacillales; Leuconostocaceae; Weissella                         | 0.6486878                    |
| Firmicutes; Clostridia; Clostridiales                                                     | 0.6638857                    |
| Firmicutes; Clostridia; Clostridiales; Lachnospiraceae                                    | 0.6486878                    |
| Firmicutes; Clostridia; Clostridiales; Lachnospiraceae; Dorea                             | 0.3827328                    |
| Firmicutes; Clostridia; Clostridiales; Lachnospiraceae; Johnsonella                       | 0.649452                     |
| Firmicutes; Clostridia; Clostridiales; Ruminococcaceae                                    | 0.4254647                    |
| Firmicutes; Clostridia; Clostridiales; Ruminococcaceae; Oscillibacter                     | 0.4254647                    |
| Firmicutes; Clostridia; Clostridiales; Veillonellaceae; Veillonella                       | 0.6486878                    |
| Proteobacteria; Alphaproteobacteria; Sphingomonadales; Sphingomonadaceae; Novosphingobium | 0.1687431                    |
| Proteobacteria; Betaproteobacteria; Burkholderiales; Comamonadaceae                       | 0.6486878                    |
| Proteobacteria; Betaproteobacteria; Burkholderiales; Comamonadaceae; Comamonas            | 0.6486878                    |
| Proteobacteria; Betaproteobacteria; Burkholderiales; Oxalobacteraceae; Massilia           | 0.8707155                    |
| Proteobacteria; Gammaproteobacteria; Enterobacteriales; Enterobacteriaceae                | 0.7751558                    |
| Proteobacteria; Gammaproteobacteria; Pseudomonadales; Moraxellaceae; Acinetobacter        | 0.6638857                    |
| Proteobacteria; Gammaproteobacteria; Pseudomonadales; Pseudomonadaceae; Pseudomonas       | 0.1687431                    |
| Proteobacteria; Gammaproteobacteria; Xanthomonadales; Xanthomonadaceae; Stenotrophomonas  | 0.6486878                    |
| Tenericutes; Mollicutes; Anaeroplasmatales; Anaeroplasmataceae; Anaeroplasma              | 0.6486878                    |

Significances calculated with FDR-corrected Kruskal-Wallis rank sum tests

Supplementary Table 2 | Taxonomic comparisons of lineages at d0 and d1 post-treatment

| Treatment | Lineage                                                                                   | FDR-corrected p-value |
|-----------|-------------------------------------------------------------------------------------------|-----------------------|
| Betadine  | Proteobacteria; Gammaproteobacteria; Pseudomonadales; Pseudomonadaceae; Pseudomonas       | 1                     |
| Betadine  | Bacteroidetes; Bacteroidia; Bacteroidales; Porphyromonadaceae                             | 1                     |
| Betadine  | Firmicutes; Bacilli; Bacillales; Staphylococcaceae; Staphylococcus                        | 1                     |
| Betadine  | Firmicutes; Clostridia; Clostridiales                                                     | 1                     |
| Betadine  | Firmicutes; Clostridia; Clostridiales; Lachnospiraceae                                    | 1                     |
| Betadine  | Proteobacteria; Gammaproteobacteria; Xanthomonadales; Xanthomonadaceae; Stenotrophomonas  | 1                     |
| Betadine  | Firmicutes; Bacilli; Lactobacillales; Enterococcaceae; Enterococcus                       | 1                     |
| Betadine  | Bacteroidetes; Flavobacteria; Flavobacteriales; Flavobacteriaceae; Elizabethkingia        | 1                     |
| Betadine  | Proteobacteria; Gammaproteobacteria; Enterobacteriales; Enterobacteriaceae                | 1                     |
| Betadine  | Firmicutes; Clostridia; Clostridiales; Ruminococcaceae                                    | 1                     |
| Betadine  | Bacteroidetes; Bacteroidia; Bacteroidales; Porphyromonadaceae; Parabacteroides            | 1                     |
| Betadine  | Bacteroidetes; Flavobacteria; Flavobacteriales; Flavobacteriaceae; Flavobacterium         | 1                     |
| Betadine  | Deferribacteres; Deferribacteres; Deferribacterales; Deferribacteraceae; Mucispirillum    | 1                     |
| Betadine  | Bacteroidetes; Sphingobacteria; Sphingobacteriales; Sphingobacteriaceae; Sphingobacterium | 1                     |
| Betadine  | Bacteroidetes; Flavobacteria; Flavobacteriales; Flavobacteriaceae; Chryseobacterium       | 1                     |
| Betadine  | Proteobacteria; Betaproteobacteria; Burkholderiales; Comamonadaceae; Comamonas            | 1                     |
| Betadine  | Firmicutes; Clostridia; Clostridiales; Ruminococcaceae; Oscillibacter                     | 1                     |
| Betadine  | Firmicutes; Bacilli; Lactobacillales; Leuconostocaceae; Weissella                         | 1                     |
| Betadine  | Proteobacteria; Betaproteobacteria; Burkholderiales; Comamonadaceae                       | 1                     |
| Betadine  | Firmicutes; Bacilli; Bacillales; Staphylococcaceae; Jeotgalicoccus                        | NA                    |
| Betadine  | Proteobacteria; Alphaproteobacteria; Sphingomonadales; Sphingomonadaceae; Novosphingobium | 1                     |
| Betadine  | Firmicutes; Clostridia; Clostridiales; Lachnospiraceae; Dorea                             | 1                     |
| Betadine  | Firmicutes; Bacilli; Lactobacillales; Lactobacillaceae; Lactobacillus                     | 1                     |
| Betadine  | Proteobacteria; Gammaproteobacteria; Pseudomonadales; Moraxellaceae; Acinetobacter        | 1                     |
| Betadine  | Tenericutes; Mollicutes; Anaeroplasmatales; Anaeroplasmataceae; Anaeroplasmata            | 1                     |
| Betadine  | Firmicutes; Clostridia; Clostridiales; Lachnospiraceae; Johnsonella                       | 1                     |
| Betadine  | Actinobacteria; Actinobacteria; Actinomycetales; Micrococcaceae; Kocuria                  | 1                     |
| Betadine  | Actinobacteria; Actinobacteria; Actinomycetales; Microbacteriaceae                        | 1                     |
| Betadine  | Firmicutes; Clostridia; Clostridiales; Veillonellaceae; Veillonella                       | 1                     |
| Betadine  | Proteobacteria; Betaproteobacteria; Burkholderiales; Oxalobacteraceae; Massilia           | 1                     |
| Ethanol   | Proteobacteria; Gammaproteobacteria; Pseudomonadales; Pseudomonadaceae; Pseudomonas       | 1                     |
| Ethanol   | Bacteroidetes; Bacteroidia; Bacteroidales; Porphyromonadaceae                             | 1                     |
| Ethanol   | Firmicutes; Bacilli; Bacillales; Staphylococcaceae; Staphylococcus                        | 0.019744961           |
| Ethanol   | Firmicutes; Clostridia; Clostridiales                                                     | 1                     |
| Ethanol   | Firmicutes; Clostridia; Clostridiales; Lachnospiraceae                                    | 1                     |
| Ethanol   | Proteobacteria; Gammaproteobacteria; Xanthomonadales; Xanthomonadaceae; Stenotrophomonas  | 1                     |
| Ethanol   | Firmicutes; Bacilli; Lactobacillales; Enterococcaceae; Enterococcus                       | 1                     |
| Ethanol   | Bacteroidetes; Flavobacteria; Flavobacteriales; Flavobacteriaceae; Elizabethkingia        | 1                     |
| Ethanol   | Proteobacteria; Gammaproteobacteria; Enterobacteriales; Enterobacteriaceae                | 1                     |
| Ethanol   | Firmicutes; Clostridia; Clostridiales; Ruminococcaceae                                    | 1                     |
| Ethanol   | Bacteroidetes; Bacteroidia; Bacteroidales; Porphyromonadaceae; Parabacteroides            | 1                     |
| Ethanol   | Bacteroidetes; Flavobacteria; Flavobacteriales; Flavobacteriaceae; Flavobacterium         | 1                     |
| Ethanol   | Deferribacteres; Deferribacteres; Deferribacterales; Deferribacteraceae; Mucispirillum    | 1                     |
| Ethanol   | Bacteroidetes; Sphingobacteria; Sphingobacteriales; Sphingobacteriaceae; Sphingobacterium | 1                     |
| Ethanol   | Bacteroidetes; Flavobacteria; Flavobacteriales; Flavobacteriaceae; Chryseobacterium       | 1                     |
| Ethanol   | Proteobacteria; Betaproteobacteria; Burkholderiales; Comamonadaceae; Comamonas            | 1                     |
| Ethanol   | Firmicutes; Clostridia; Clostridiales; Ruminococcaceae; Oscillibacter                     | 1                     |
| Ethanol   | Firmicutes; Bacilli; Lactobacillales; Leuconostocaceae; Weissella                         | 1                     |
| Ethanol   | Proteobacteria; Betaproteobacteria; Burkholderiales; Comamonadaceae                       | 1                     |
| Ethanol   | Firmicutes; Bacilli; Bacillales; Staphylococcaceae; Jeotgalicoccus                        | 1                     |
| Ethanol   | Proteobacteria; Alphaproteobacteria; Sphingomonadales; Sphingomonadaceae; Novosphingobium | 1                     |
| Ethanol   | Firmicutes; Clostridia; Clostridiales; Lachnospiraceae; Dorea                             | 1                     |
| Ethanol   | Firmicutes; Bacilli; Lactobacillales; Lactobacillaceae; Lactobacillus                     | 1                     |
| Ethanol   | Proteobacteria; Gammaproteobacteria; Pseudomonadales; Moraxellaceae; Acinetobacter        | 1                     |
| Ethanol   | Tenericutes; Mollicutes; Anaeroplasmatales; Anaeroplasmataceae; Anaeroplasmata            | 1                     |
| Ethanol   | Firmicutes; Clostridia; Clostridiales; Lachnospiraceae; Johnsonella                       | 1                     |
| Ethanol   | Actinobacteria; Actinobacteria; Actinomycetales; Micrococcaceae; Kocuria                  | 1                     |
| Ethanol   | Actinobacteria; Actinobacteria; Actinomycetales; Microbacteriaceae                        | 1                     |
| Ethanol   | Firmicutes; Clostridia; Clostridiales; Veillonellaceae; Veillonella                       | 1                     |
| Ethanol   | Proteobacteria; Betaproteobacteria; Burkholderiales; Oxalobacteraceae; Massilia           | 1                     |
| No Treat  | Proteobacteria; Gammaproteobacteria; Pseudomonadales; Pseudomonadaceae; Pseudomonas       | 0.932949404           |
| No Treat  | Bacteroidetes; Bacteroidia; Bacteroidales; Porphyromonadaceae                             | 1                     |
| No Treat  | Firmicutes; Bacilli; Bacillales; Staphylococcaceae; Staphylococcus                        | 0.148087207           |
| No Treat  | Firmicutes; Clostridia; Clostridiales                                                     | 1                     |
| No Treat  | Firmicutes; Clostridia; Clostridiales; Lachnospiraceae                                    | 1                     |
| No Treat  | Proteobacteria; Gammaproteobacteria; Xanthomonadales; Xanthomonadaceae; Stenotrophomonas  | 1                     |
| No Treat  | Firmicutes; Bacilli; Lactobacillales; Enterococcaceae; Enterococcus                       | 1                     |
| No Treat  | Bacteroidetes; Flavobacteria; Flavobacteriales; Flavobacteriaceae; Elizabethkingia        | 1                     |
| No Treat  | Proteobacteria; Gammaproteobacteria; Enterobacteriales; Enterobacteriaceae                | 1                     |
| No Treat  | Firmicutes; Clostridia; Clostridiales; Ruminococcaceae                                    | 1                     |
| No Treat  | Bacteroidetes; Bacteroidia; Bacteroidales; Porphyromonadaceae; Parabacteroides            | 1                     |
| No Treat  | Bacteroidetes; Flavobacteria; Flavobacteriales; Flavobacteriaceae; Flavobacterium         | 1                     |
| No Treat  | Deferribacteres; Deferribacteres; Deferribacterales; Deferribacteraceae; Mucispirillum    | 1                     |
| No Treat  | Bacteroidetes; Sphingobacteria; Sphingobacteriales; Sphingobacteriaceae; Sphingobacterium | 0.388151273           |
| No Treat  | Bacteroidetes; Flavobacteria; Flavobacteriales; Flavobacteriaceae; Chryseobacterium       | 1                     |
| No Treat  | Proteobacteria; Betaproteobacteria; Burkholderiales; Comamonadaceae; Comamonas            | 0.289846607           |
| No Treat  | Firmicutes; Clostridia; Clostridiales; Ruminococcaceae; Oscillibacter                     | 1                     |
| No Treat  | Firmicutes; Bacilli; Lactobacillales; Leuconostocaceae; Weissella                         | 1                     |
| No Treat  | Proteobacteria; Betaproteobacteria; Burkholderiales; Comamonadaceae                       | 1                     |
| No Treat  | Firmicutes; Bacilli; Bacillales; Staphylococcaceae; Jeotgalicoccus                        | 1                     |
| No Treat  | Proteobacteria; Alphaproteobacteria; Sphingomonadales; Sphingomonadaceae; Novosphingobium | 0.070091195           |

|          |                                                                                           |            |
|----------|-------------------------------------------------------------------------------------------|------------|
| No Treat | Firmicutes; Clostridia; Clostridiales; Lachnospiraceae; Dorea                             | 1          |
| No Treat | Firmicutes; Bacilli; Lactobacillales; Lactobacillaceae; Lactobacillus                     | 1          |
| No Treat | Proteobacteria; Gammaproteobacteria; Pseudomonadales; Moraxellaceae; Acinetobacter        | 1          |
| No Treat | Tenericutes; Mollicutes; Anaeroplasmatales; Anaeroplasmataceae; Anaeroplasmata            | 1          |
| No Treat | Firmicutes; Clostridia; Clostridiales; Lachnospiraceae; Johnsonella                       | 1          |
| No Treat | Actinobacteria; Actinobacteria; Actinomycetales; Micrococcaceae; Kocuria                  | 1          |
| No Treat | Actinobacteria; Actinobacteria; Actinomycetales; Microbacteriaceae                        | 1          |
| No Treat | Firmicutes; Clostridia; Clostridiales; Veillonellaceae; Veillonella                       | 1          |
| No Treat | Proteobacteria; Betaproteobacteria; Burkholderiales; Oxalobacteraceae; Massilia           | 1          |
| Water    | Proteobacteria; Gammaproteobacteria; Pseudomonadales; Pseudomonadaceae; Pseudomonas       | 1          |
| Water    | Bacteroidetes; Bacteroidia; Bacteroidales; Porphyromonadaceae                             | 1          |
| Water    | Firmicutes; Bacilli; Bacillales; Staphylococcaceae; Staphylococcus                        | 0.22213081 |
| Water    | Firmicutes; Clostridia; Clostridiales                                                     | 1          |
| Water    | Firmicutes; Clostridia; Clostridiales; Lachnospiraceae                                    | 1          |
| Water    | Proteobacteria; Gammaproteobacteria; Xanthomonadales; Xanthomonadaceae; Stenotrophomonas  | 1          |
| Water    | Firmicutes; Bacilli; Lactobacillales; Enterococcaceae; Enterococcus                       | 1          |
| Water    | Bacteroidetes; Flavobacteria; Flavobacteriales; Flavobacteriaceae; Elizabethkingia        | 1          |
| Water    | Proteobacteria; Gammaproteobacteria; Enterobacteriales; Enterobacteriaceae                | 1          |
| Water    | Firmicutes; Clostridia; Clostridiales; Ruminococcaceae                                    | 1          |
| Water    | Bacteroidetes; Bacteroidia; Bacteroidales; Porphyromonadaceae; Parabacteroides            | 1          |
| Water    | Bacteroidetes; Flavobacteria; Flavobacteriales; Flavobacteriaceae; Flavobacterium         | 1          |
| Water    | Deferribacteres; Deferribacteres; Deferribacterales; Deferribacteraceae; Mucispirillum    | 1          |
| Water    | Bacteroidetes; Sphingobacteria; Sphingobacteriales; Sphingobacteriaceae; Sphingobacterium | 1          |
| Water    | Bacteroidetes; Flavobacteria; Flavobacteriales; Flavobacteriaceae; Chryseobacterium       | 1          |
| Water    | Proteobacteria; Betaproteobacteria; Burkholderiales; Comamonadaceae; Comamonas            | 1          |
| Water    | Firmicutes; Clostridia; Clostridiales; Ruminococcaceae; Oscillibacter                     | 1          |
| Water    | Firmicutes; Bacilli; Lactobacillales; Leuconostocaceae; Weissella                         | 1          |
| Water    | Proteobacteria; Betaproteobacteria; Burkholderiales; Comamonadaceae                       | 1          |
| Water    | Firmicutes; Bacilli; Bacillales; Staphylococcaceae; Jeotgaliococcus                       | NA         |
| Water    | Proteobacteria; Alphaproteobacteria; Sphingomonadales; Sphingomonadaceae; Novosphingobium | 1          |
| Water    | Firmicutes; Clostridia; Clostridiales; Lachnospiraceae; Dorea                             | 1          |
| Water    | Firmicutes; Bacilli; Lactobacillales; Lactobacillaceae; Lactobacillus                     | 1          |
| Water    | Proteobacteria; Gammaproteobacteria; Pseudomonadales; Moraxellaceae; Acinetobacter        | 1          |
| Water    | Tenericutes; Mollicutes; Anaeroplasmatales; Anaeroplasmataceae; Anaeroplasmata            | 1          |
| Water    | Firmicutes; Clostridia; Clostridiales; Lachnospiraceae; Johnsonella                       | 1          |
| Water    | Actinobacteria; Actinobacteria; Actinomycetales; Micrococcaceae; Kocuria                  | 1          |
| Water    | Actinobacteria; Actinobacteria; Actinomycetales; Microbacteriaceae                        | 1          |
| Water    | Firmicutes; Clostridia; Clostridiales; Veillonellaceae; Veillonella                       | 1          |
| Water    | Proteobacteria; Betaproteobacteria; Burkholderiales; Oxalobacteraceae; Massilia           | 1          |

Significances calculated with FDR-corrected Wilcoxon rank sum tests
